# Supplementary material
Source: Springer Nature journal article supplement (https://www.springermedizin.de/resource/supplementary/12889_2009_1867_MOESM6_ESM.pdf/9504240)
Supplement: MOESM6 [file 9504240]

(A) malignant neoplasms

|      |             | Female  |             |
|------|-------------|---------|-------------|
|      |             | cluster | non-cluster |
| Male | cluster     | 24      | 37          |
|      | non-cluster | 27      | 261         |

Consistent rate:0.817

(B) cerebrovascular disease

|      |             | Female  |             |
|------|-------------|---------|-------------|
|      |             | cluster | non-cluster |
| Male | cluster     | 24      | 6           |
|      | non-cluster | 26      | 293         |

Consistent rate:0.908

(C) heart disease

|      |             | Female  |             |
|------|-------------|---------|-------------|
|      |             | cluster | non-cluster |
| Male | cluster     | 28      | 6           |
|      | non-cluster | 45      | 270         |

Consistent rate:0.854

(D) diabetes mellitus

|      |             | Female  |             |
|------|-------------|---------|-------------|
|      |             | cluster | non-cluster |
| Male | cluster     | 16      | 22          |
|      | non-cluster | 21      | 290         |

Consistent rate:0.877

(E) accidents and adverse effects

|      |             | Female  |             |
|------|-------------|---------|-------------|
|      |             | cluster | non-cluster |
| Male | cluster     | 38      | 3           |
|      | non-cluster | 2       | 306         |

Consistent rate:0.986

(F) pneumonia

|      |             | Female  |             |
|------|-------------|---------|-------------|
|      |             | cluster | non-cluster |
| Male | cluster     | 43      | 10          |
|      | non-cluster | 5       | 291         |

Consistent rate:0.957

(G) chronic liver disease and cirrhosis

|      |             | Female  |             |
|------|-------------|---------|-------------|
|      |             | cluster | non-cluster |
| Male | cluster     | 52      | 14          |
|      | non-cluster | 11      | 272         |

Consistent rate:0.928

(H) nephritis, nephritic syndrome and nephrosis

|      |             | Female  |             |
|------|-------------|---------|-------------|
|      |             | cluster | non-cluster |
| Male | cluster     | 28      | 41          |
|      | non-cluster | 21      | 259         |

Consistent rate:0.822

(I) suicide

|      |             | Female  |             |
|------|-------------|---------|-------------|
|      |             | cluster | non-cluster |
| Male | cluster     | 18      | 15          |
|      | non-cluster | 7       | 309         |

Consistent rate:0.937

(J) hypertensive disease

|      |             | Female  |             |
|------|-------------|---------|-------------|
|      |             | cluster | non-cluster |
| Male | cluster     | 42      | 2           |
|      | non-cluster | 14      | 291         |

Consistent rate:0.954

(K) bronchitis, emphysema and asthma

|      |             | Female  |             |
|------|-------------|---------|-------------|
|      |             | cluster | non-cluster |
| Male | cluster     | 28      | 6           |
|      | non-cluster | 8       | 307         |

Consistent rate:0.960

(L) septicaemia

|      |             | Female  |             |
|------|-------------|---------|-------------|
|      |             | cluster | non-cluster |
| Male | cluster     | 73      | 15          |
|      | non-cluster | 19      | 242         |

Consistent rate:0.901

(M) tuberculosis

|      |             | Female  |             |
|------|-------------|---------|-------------|
|      |             | cluster | non-cluster |
| Male | cluster     | 44      | 5           |
|      | non-cluster | 2       | 298         |

Consistent rate:0.980

(N) ulcer of stomach and duodenum

|      |             | Female  |             |
|------|-------------|---------|-------------|
|      |             | cluster | non-cluster |
| Male | cluster     | 60      | 10          |
|      | non-cluster | 38      | 241         |

Consistent rate:0.862

(O) certain conditions originating in the perinatal period

|      |             | Female  |             |
|------|-------------|---------|-------------|
|      |             | cluster | non-cluster |
| Male | cluster     | 31      | 22          |
|      | non-cluster | 45      | 251         |

Consistent rate:0.808

(P) congenital anomalies

|      |             | Female  |             |
|------|-------------|---------|-------------|
|      |             | cluster | non-cluster |
| Male | cluster     | 35      | 26          |
|      | non-cluster | 35      | 253         |

Consistent rate:0.825

(Q) anaemias

|      |             | Female  |             |
|------|-------------|---------|-------------|
|      |             | cluster | non-cluster |
| Male | cluster     | 39      | 27          |
|      | non-cluster | 28      | 255         |

Consistent rate:0.842

(R) homicide

|      |             | Female  |             |
|------|-------------|---------|-------------|
|      |             | cluster | non-cluster |
| Male | cluster     | 24      | 4           |
|      | non-cluster | 9       | 312         |

Consistent rate:0.963

(S) meningitis

|      |             | Female  |             |
|------|-------------|---------|-------------|
|      |             | cluster | non-cluster |
| Male | cluster     | 20      | 21          |
|      | non-cluster | 12      | 296         |

Consistent rate:0.905

(T) other protein-calorie malnutrition

|      |             | Female  |             |
|------|-------------|---------|-------------|
|      |             | cluster | non-cluster |
| Male | cluster     | 10      | 1           |
|      | non-cluster | 1       | 337         |

Consistent rate:0.994

# Consistent rate is the rate that both male and female are cluster or non-cluster.
